# Supplementary material for: The zinc-finger transcription factor Sfp1 imprints specific classes of mRNAs and links their synthesis to cytoplasmic decay
Source: eLife journal article supplement (doi:10.7554/elife.90766), 2023-12-05
Supplement: supp1 [file elife-90766-supp1-v1.pdf]

## Table S1

### Yeast strains

|         |                                                                                                                                                          |                    |
|---------|----------------------------------------------------------------------------------------------------------------------------------------------------------|--------------------|
| BY4741  | <i>MAT a his3<math>\Delta</math>1 leu2<math>\Delta</math>0 met15 <math>\Delta</math>0 ura3 <math>\Delta</math>0</i>                                      | EUROSCARF          |
| Y05312  | BY4741 <i>ylr403w (sfp1)::kanMX4</i>                                                                                                                     | EUROSCARF          |
| LMY3.1  | BY4741 <i>YJL140w (RPB4)::MYC18-TRP1</i>                                                                                                                 | This work          |
| LMY7.1  | BY4741 <i>YJL140w (RPB4)::Myc18-TRP1 ylr403w(sfp1)::kanMX4</i>                                                                                           | This work          |
| yMC1019 | BY4741, HTP- <i>SFP1</i>                                                                                                                                 | This work          |
| yMC1020 | BY4741, HTP- <i>SFP1</i>                                                                                                                                 | This work          |
| yMC1021 | BY4741, HTP- <i>SFP1 rpb4<math>\Delta</math>::CloNAT</i>                                                                                                 | This work          |
| yMC1022 | BY4741, HTP- <i>SFP1 rpb4<math>\Delta</math>::CloNAT</i>                                                                                                 | This work          |
| yMC189  | <i>MAT<math>\alpha</math> his3 leu2 ura3 ade2 ade3 nup49::TRP1 pUN100</i><br>(CEN/LEU2/nup49-313)                                                        | P. Silver (PSy413) |
| yMC190  | <i>MAT<math>\alpha</math> rpb1-1 his3 leu2 ura3 ade3 nup49::TRP1 pUN100</i><br>(CEN/LEU2/nup49-313)                                                      | P. Silver (PSy844) |
| yMS1    | yMC189 + pMC295 (pRS316:: <i>GFP-SFP1</i> )                                                                                                              | This work          |
| yMS2    | yMC190 + pMC295 (pRS316:: <i>GFP-SFP1</i> )                                                                                                              | This work          |
| yMS119  | <i>leu2 ura3 rpb4<math>\Delta</math>::KAN, sfp1<math>\Delta</math>::ura3</i> + pMC305 (pRS316:: <i>RPB4-RFP</i> )+<br>pMC295 (pRS315:: <i>GFP-SFP1</i> ) | This work          |
| yMC805  | W303 background; <i>leu2-3,112 HIS3,15 ura3-1::pADH1-OsTIR1-URA3</i><br><i>ADE2 trp1-1 can1-100 MAT<math>\alpha</math></i>                               | David Shore        |
| yMC806  | W303 background; <i>SFP1-AID::hph, leu2-3,112 HIS3,15 ura3-1::pADH1-</i><br><i>OstIR1-URA3 ADE2 trp1-1 can1-100 MAT<math>\alpha</math></i>               | David Shore        |
