# Supplementary material for: The zinc-finger transcription factor Sfp1 imprints specific classes of mRNAs and links their synthesis to cytoplasmic decay
Source: eLife. 2024 Oct 2;12:RP90766. doi: 10.7554/eLife.90766 (PMC11446548; doi:10.7554/eLife.90766)
Supplement: Supplementary file 2. [file elife-90766-supp2.xlsx]

## Sheet: CRAC_index_RNAseq
Gene	Name	RPKMs_CRAC/RPKMs_RNAseq	GCTGCT_motif
YBR230W-A	YBR230W-A	6.80223	NO
YJL047C-A	YJL047C-A	6.12288	NO
YBR258C	SHG1	0.555535	NO
YLR194C	YLR194C	0.522272	YES
YGR020C	VMA7	0.479141	NO
YOL049W	GSH2	0.390257	YES
YOR297C	TIM18	0.354155	NO
YKL104C	GFA1	0.224534	YES
YEL048C	TCA17	0.187303	NO
YLR109W	AHP1	0.162484	YES
YPR005C	HAL1	0.149234	YES
YPR016C	TIF6	0.139268	YES
YMR316W	DIA1	0.124647	NO
YLR356W	ATG33	0.122393	YES
YJL143W	TIM17	0.115002	YES
YHR041C	SRB2	0.106561	NO
YDR071C	PAA1	0.103611	NO
YMR158W	MRPS8	0.103007	NO
YMR194W	RPL36A	0.0801208	YES
YPL098C	MGR2	0.0797549	YES
YBR205W	KTR3	0.079694	YES
YNL016W	PUB1	0.0694912	NO
YMR157C	AIM36	0.0694372	NO
YNL304W	YPT11	0.0672059	NO
YGL136C	MRM2	0.0594094	NO
YBR031W	RPL4A	0.0541442	YES
YDR323C	PEP7	0.0540368	NO
YDR397C	NCB2	0.0536302	YES
YNL249C	MPA43	0.0521444	NO
YNL220W	ADE12	0.049387	YES
YKR090W	PXL1	0.0478299	NO
YGR085C	RPL11B	0.0442518	NO
YPR134W	MSS18	0.0435131	YES
YDR236C	FMN1	0.0375018	NO
YDR450W	RPS18A	0.0368531	NO
YJR094W-A	RPL43B	0.0368327	YES
YDR510W	SMT3	0.0368173	YES
YAL003W	EFB1	0.0349585	YES
YBR107C	IML3	0.0343336	NO
YIL067C	YIL067C	0.0335952	NO
YLR233C	EST1	0.032653	YES
YFL021W	GAT1	0.0320328	YES
YJR055W	HIT1	0.0313786	NO
YNL206C	RTT106	0.0298156	NO
YLR185W	RPL37A	0.0284568	YES
YJL192C	SOP4	0.028153	YES
YDL135C	RDI1	0.0271612	NO
YCR044C	PER1	0.0269561	NO
YDR276C	PMP3	0.0269453	NO
YKL156W	RPS27A	0.0265321	YES
YKL181W	PRS1	0.0258214	NO
YDR214W	AHA1	0.0257885	YES
YJL026W	RNR2	0.0255359	YES
YBR239C	ERT1	0.0247046	NO
YGL079W	KXD1	0.0242171	NO
YOL039W	RPP2A	0.0240366	YES
YOR323C	PRO2	0.023847	YES
YIL138C	TPM2	0.0233945	NO
YGR257C	MTM1	0.0217714	YES
YOR324C	FRT1	0.0215431	YES
YLR262C-A	TMA7	0.0211388	YES
YMR122W-A	YMR122W-A	0.0201718	YES
YPL010W	RET3	0.0197135	YES
YDR064W	RPS13	0.0196987	YES
YGR040W	KSS1	0.0193138	NO
YHR063C	PAN5	0.0189167	NO
YHR021C	RPS27B	0.0183744	NO
YKR043C	SHB17	0.0183134	YES
YOL081W	IRA2	0.0182108	YES
YML069W	POB3	0.018208	YES
YKL085W	MDH1	0.0181174	NO
YPL034W	YPL034W	0.0180184	YES
YPL240C	HSP82	0.017417	YES
YDL136W	RPL35B	0.017157	YES
YDL086W	YDL086W	0.0169898	NO
YER074W	RPS24A	0.0160023	NO
YOR110W	TFC7	0.0156969	YES
YAL040C	CLN3	0.015692	NO
YHR168W	MTG2	0.0156258	NO
YPL043W	NOP4	0.0151937	NO
YER056C-A	RPL34A	0.0151591	YES
YHL015W	RPS20	0.0136778	YES
YOR369C	RPS12	0.0135617	YES
YML130C	ERO1	0.0135228	YES
YLR116W	MSL5	0.0132643	NO
YEL054C	RPL12A	0.012977	YES
YGL030W	RPL30	0.0129672	YES
YCR005C	CIT2	0.0129458	YES
YDR500C	RPL37B	0.0125876	NO
YGL048C	RPT6	0.0124708	YES
YDR235W	PRP42	0.012399	NO
YHR042W	NCP1	0.0122299	YES
YOR021C	YOR021C	0.0119987	YES
YDL100C	GET3	0.0113806	NO
YML028W	TSA1	0.0113301	YES
YPL270W	MDL2	0.0110066	NO
YHR072W	ERG7	0.0103102	NO
YJL127C-B	YJL127C-B	0.00991807	NO
YJL081C	ARP4	0.00988761	NO
YEL003W	GIM4	0.00935171	YES
YDL061C	RPS29B	0.00924065	NO
YCR004C	YCP4	0.00919391	YES
YDL133C-A	RPL41B	0.00916352	NO
YDR328C	SKP1	0.00907586	YES
YBR056W	YBR056W	0.00905364	YES
YKL082C	RRP14	0.00877315	NO
YIL042C	PKP1	0.00819796	NO
YBL028C	YBL028C	0.00808509	NO
YLR167W	RPS31	0.00787857	YES
YKR001C	VPS1	0.00753117	YES
YDR299W	BFR2	0.00752443	YES
YNL244C	SUI1	0.00744354	YES
YDL075W	RPL31A	0.00731115	YES
YHR108W	GGA2	0.00700108	YES
YJL189W	RPL39	0.00689045	NO
YHR195W	NVJ1	0.00671564	NO
YJR077C	MIR1	0.00666643	YES
YGL227W	VID30	0.00645332	NO
YPL131W	RPL5	0.00639467	YES
YNL302C	RPS19B	0.00609199	YES
YDL130W	RPP1B	0.00602815	YES
YLR110C	CCW12	0.0059655	YES
YML073C	RPL6A	0.00585543	YES
YIL052C	RPL34B	0.00582469	YES
YOR020C	HSP10	0.0057314	NO
YIL051C	MMF1	0.00570818	YES
YPR036W-A	YPR036W-A	0.00567591	NO
YLR117C	CLF1	0.00547591	NO
YHR162W	YHR162W	0.00522725	NO
YHL033C	RPL8A	0.00520737	YES
YER057C	HMF1	0.00509919	YES
YFR032C-A	RPL29	0.00509177	YES
YLR355C	ILV5	0.00508561	NO
YMR290C	HAS1	0.00502268	YES
YFR037C	RSC8	0.00499931	NO
YBL030C	PET9	0.00498481	YES
YOR330C	MIP1	0.00494606	NO
YML024W	RPS17A	0.00485085	YES
YML063W	RPS1B	0.00481703	YES
YLR264W	RPS28B	0.00477809	YES
YJL158C	CIS3	0.00469821	YES
YMR242C	RPL20A	0.00424548	NO
YOR202W	HIS3	0.00419704	YES
YNL247W	YNL247W	0.0040399	NO
YMR295C	YMR295C	0.00398946	NO
YLR075W	RPL10	0.00381788	YES
YCL034W	LSB5	0.00365822	YES
YPL249C-A	RPL36B	0.00361485	YES
YFL037W	TUB2	0.00349999	YES
YGL106W	MLC1	0.00347642	NO
YHL027W	RIM101	0.00345803	YES
YNL145W	MFA2	0.00345517	NO
YJR145C	RPS4A	0.00342242	NO
YMR143W	RPS16A	0.00336453	YES
YMR125W	STO1	0.00334377	NO
YEL017C-A	PMP2	0.00332718	NO
YLR175W	CBF5	0.00327388	NO
YFL018C	LPD1	0.00322588	YES
YJR104C	SOD1	0.00322229	YES
YBR009C	HHF1	0.00313929	YES
YJR139C	HOM6	0.00310315	YES
YOR361C	PRT1	0.00306303	NO
YGL189C	RPS26A	0.00293309	YES
YHL034C	SBP1	0.00274993	YES
YGL123W	RPS2	0.0027373	YES
YDR161W	YDR161W	0.00273468	NO
YOR182C	RPS30B	0.00265665	YES
YIL148W	RPL40A	0.00264651	NO
YHR019C	DED81	0.00254146	NO
YDR507C	GIN4	0.00232969	YES
YFR031C-A	RPL2A	0.00231852	YES
YPL143W	RPL33A	0.00228104	YES
YGR148C	RPL24B	0.00223075	YES
YDL081C	RPP1A	0.00213126	NO
YDR429C	TIF35	0.00200983	YES
YKL081W	TEF4	0.00196898	YES
YIL018W	RPL2B	0.00194783	YES
YPL106C	SSE1	0.00193321	YES
YGL103W	RPL28	0.00192406	YES
YKL152C	GPM1	0.00191344	YES
YMR116C	ASC1	0.00188727	YES
YLR390W-A	CCW14	0.00187799	YES
YGR014W	MSB2	0.001831	NO
YLR150W	STM1	0.00180007	YES
YLR029C	RPL15A	0.00171916	YES
YKL054C	DEF1	0.00163839	YES
YBR189W	RPS9B	0.00162558	YES
YJR123W	RPS5	0.00159249	YES
YBL099W	ATP1	0.00157193	NO
YFL039C	ACT1	0.00155239	NO
YBR181C	RPS6B	0.00154896	YES
YJL136C	RPS21B	0.00150537	YES
YGR229C	SMI1	0.00148218	YES
YHR193C	EGD2	0.00147985	NO
YBL017C	PEP1	0.00136973	NO
YJL012C	VTC4	0.00133591	YES
YJR138W	IML1	0.00129164	NO
YLR061W	RPL22A	0.00127025	NO
YGR285C	ZUO1	0.0012663	YES
YPR043W	RPL43A	0.00126599	YES
YNL087W	TCB2	0.00117808	YES
YBR162C	TOS1	0.00116627	YES
YAL005C	SSA1	0.00116221	YES
YNL104C	LEU4	0.00112387	YES
YER131W	RPS26B	0.00108646	YES
YLR441C	RPS1A	0.00107123	NO
YDL095W	PMT1	0.0010704	YES
YEL002C	WBP1	0.00103098	NO
YJR009C	TDH2	0.000995627	NO
YNL178W	RPS3	0.000987878	NO
YNL031C	HHT2	0.000980414	YES
YBR011C	IPP1	0.000926108	YES
YDR050C	TPI1	0.000919826	YES
YOR167C	RPS28A	0.000904681	NO
YBR218C	PYC2	0.000879827	YES
YJL190C	RPS22A	0.000849855	YES
YDL083C	RPS16B	0.000832654	YES
YLR027C	AAT2	0.00082742	YES
YDL022W	GPD1	0.000820932	YES
YKL056C	TMA19	0.00079577	YES
YGR034W	RPL26B	0.00076904	YES
YCR012W	PGK1	0.000751328	YES
YOR332W	VMA4	0.000738033	YES
YBR127C	VMA2	0.000726599	YES
YOR293W	RPS10A	0.000722798	NO
YIL133C	RPL16A	0.000681462	YES
YDR418W	RPL12B	0.000676321	YES
YHR203C	RPS4B	0.000666353	NO
YGR192C	TDH3	0.000649426	YES
YGL092W	NUP145	0.000635505	NO
YNL209W	SSB2	0.000631371	YES
YER043C	SAH1	0.000623715	NO
YKL096W-A	CWP2	0.00058755	YES
YER025W	GCD11	0.000563556	NO
YOR270C	VPH1	0.000549345	YES
YCR031C	RPS14A	0.000536894	YES
YNL069C	RPL16B	0.000495127	YES
YHR174W	ENO2	0.000492517	YES
YLR287C-A	RPS30A	0.000491048	NO
YMR251W-A	HOR7	0.000461479	YES
YOL120C	RPL18A	0.000428051	NO
YLR340W	RPP0	0.000416573	YES
YDL084W	SUB2	0.000408943	NO
YAL038W	CDC19	0.000405497	YES
YGR282C	BGL2	0.000390376	YES
YOR153W	PDR5	0.000350208	YES
YOL040C	RPS15	0.000343209	YES
YOR063W	RPL3	0.000332606	YES
YOL058W	ARG1	0.000313146	NO
YJL159W	HSP150	0.000309732	NO
YLR044C	PDC1	0.000306792	YES
YDL229W	SSB1	0.00028177	YES
YLL045C	RPL8B	0.000273343	YES
YKL060C	FBA1	0.000249415	YES
YMR186W	HSC82	0.000248461	YES
YOL086C	ADH1	0.000238104	YES
YGR254W	ENO1	0.000216679	YES
YJL052W	TDH1	0.000161857	YES
YBR196C	PGI1	0.000151718	YES
YDR127W	ARO1	8.88856e-05	YES
YLR249W	YEF3	8.78654e-05	YES
YGL008C	PMA1	8.40984e-05	YES

## Sheet: CRAC_index_ChIPexo
Gene	Name	RPKMs_CRAC/RPKMs_ChIPexo_RPB3	GCTGCT_motif
YGR020C	VMA7	4.83542	NO
YKL104C	GFA1	4.10631	YES
YOL049W	GSH2	1.65316	YES
YLR194C	YLR194C	1.59498	YES
YHR041C	SRB2	1.39323	NO
YBR031W	RPL4A	1.27864	YES
YNL016W	PUB1	1.02314	NO
YDR450W	RPS18A	0.8113	NO
YJL026W	RNR2	0.799128	YES
YMR316W	DIA1	0.772842	NO
YBR258C	SHG1	0.667979	NO
YPR016C	TIF6	0.617324	YES
YNL220W	ADE12	0.543032	YES
YOR297C	TIM18	0.517672	NO
YOL081W	IRA2	0.502553	YES
YDR323C	PEP7	0.474829	NO
YJL047C-A	YJL047C-A	0.436076	NO
YBR230W-A	YBR230W-A	0.415306	NO
YMR194W	RPL36A	0.405473	YES
YOR323C	PRO2	0.366128	YES
YMR158W	MRPS8	0.340728	NO
YDR071C	PAA1	0.339032	NO
YGR085C	RPL11B	0.33679	NO
YEL048C	TCA17	0.325529	NO
YAL003W	EFB1	0.318252	YES
YHL015W	RPS20	0.314198	YES
YJL143W	TIM17	0.299374	YES
YKL085W	MDH1	0.291305	NO
YNL249C	MPA43	0.261665	NO
YPR005C	HAL1	0.259962	YES
YLR109W	AHP1	0.25615	YES
YDR214W	AHA1	0.226133	YES
YCR004C	YCP4	0.2193	YES
YJL192C	SOP4	0.218028	YES
YBR205W	KTR3	0.211834	YES
YFL021W	GAT1	0.20944	YES
YDL086W	YDL086W	0.208273	NO
YIL067C	YIL067C	0.204715	NO
YKL181W	PRS1	0.204398	NO
YMR157C	AIM36	0.19946	NO
YER074W	RPS24A	0.194731	NO
YKR001C	VPS1	0.187924	YES
YPL240C	HSP82	0.187007	YES
YDR397C	NCB2	0.185863	YES
YJR094W-A	RPL43B	0.175851	YES
YIL138C	TPM2	0.16613	NO
YOL039W	RPP2A	0.16069	YES
YGL136C	MRM2	0.158181	NO
YML130C	ERO1	0.156926	YES
YHR063C	PAN5	0.154018	NO
YNL304W	YPT11	0.147678	NO
YPL043W	NOP4	0.144335	NO
YPL098C	MGR2	0.143782	YES
YML063W	RPS1B	0.141135	YES
YER056C-A	RPL34A	0.140231	YES
YPL131W	RPL5	0.138071	YES
YDR064W	RPS13	0.135964	YES
YLR356W	ATG33	0.134953	YES
YEL054C	RPL12A	0.132645	YES
YGL030W	RPL30	0.131698	YES
YHR042W	NCP1	0.131308	YES
YOR369C	RPS12	0.129441	YES
YLR262C-A	TMA7	0.128399	YES
YLR167W	RPS31	0.127347	YES
YKL156W	RPS27A	0.124086	YES
YNL206C	RTT106	0.123345	NO
YDL100C	GET3	0.123111	NO
YNL104C	LEU4	0.122718	YES
YKR090W	PXL1	0.119126	NO
YGL065C	ALG2	0.117218	NO
YLR185W	RPL37A	0.117177	YES
YDL135C	RDI1	0.10908	NO
YDR500C	RPL37B	0.107924	NO
YBL030C	PET9	0.101048	YES
YGL048C	RPT6	0.100575	YES
YDR510W	SMT3	0.0974821	YES
YBR239C	ERT1	0.0957312	NO
YPL270W	MDL2	0.0956682	NO
YHR021C	RPS27B	0.0934697	NO
YBR056W	YBR056W	0.0909862	YES
YOR324C	FRT1	0.0897275	YES
YFL018C	LPD1	0.089608	YES
YHR072W	ERG7	0.0892233	NO
YDL136W	RPL35B	0.0889933	YES
YML069W	POB3	0.0878745	YES
YJR055W	HIT1	0.0874832	NO
YJR077C	MIR1	0.0821168	YES
YCR044C	PER1	0.081644	NO
YHR108W	GGA2	0.0790737	YES
YDR276C	PMP3	0.0760876	NO
YBL099W	ATP1	0.0755924	NO
YHR019C	DED81	0.0746041	NO
YLR233C	EST1	0.0735615	YES
YML028W	TSA1	0.0731208	YES
YGR257C	MTM1	0.0729971	YES
YJR139C	HOM6	0.0724457	YES
YHR162W	YHR162W	0.0693047	NO
YPL010W	RET3	0.0688605	YES
YAL040C	CLN3	0.064841	NO
YNL247W	YNL247W	0.0639391	NO
YDL075W	RPL31A	0.0627471	YES
YNL302C	RPS19B	0.0614172	YES
YML024W	RPS17A	0.05944	YES
YFL039C	ACT1	0.0573146	NO
YMR122W-A	YMR122W-A	0.0572835	YES
YOR330C	MIP1	0.0568553	NO
YLR110C	CCW12	0.0540237	YES
YIL052C	RPL34B	0.0535285	YES
YOR110W	TFC7	0.0525036	YES
YGL123W	RPS2	0.0524138	YES
YGL189C	RPS26A	0.052002	YES
YPR134W	MSS18	0.0519768	YES
YHR168W	MTG2	0.0519394	NO
YLR150W	STM1	0.0519379	YES
YMR125W	STO1	0.050901	NO
YLR075W	RPL10	0.0494415	YES
YIL051C	MMF1	0.0480969	YES
YPL106C	SSE1	0.0479255	YES
YJL081C	ARP4	0.0476862	NO
YDR328C	SKP1	0.0464782	YES
YNL244C	SUI1	0.0461647	YES
YMR143W	RPS16A	0.0458739	YES
YOL058W	ARG1	0.0455988	NO
YAL005C	SSA1	0.0454285	YES
YOR361C	PRT1	0.045252	NO
YLR355C	ILV5	0.0437004	NO
YJR145C	RPS4A	0.0433527	NO
YMR116C	ASC1	0.0430542	YES
YBL028C	YBL028C	0.0425755	NO
YFL037W	TUB2	0.0417396	YES
YKR043C	SHB17	0.0404559	YES
YJL189W	RPL39	0.0402926	NO
YBR218C	PYC2	0.03928	YES
YMR242C	RPL20A	0.0389334	NO
YOR021C	YOR021C	0.0384567	YES
YGR040W	KSS1	0.0375719	NO
YML073C	RPL6A	0.0375096	YES
YDR235W	PRP42	0.037458	NO
YLR116W	MSL5	0.0372542	NO
YIL148W	RPL40A	0.0371308	NO
YGL227W	VID30	0.0370912	NO
YDR236C	FMN1	0.0367146	NO
YDL061C	RPS29B	0.0362681	NO
YFR031C-A	RPL2A	0.0355001	YES
YMR290C	HAS1	0.0351594	YES
YKL096W-A	CWP2	0.0344019	YES
YLR175W	CBF5	0.0341023	NO
YGL106W	MLC1	0.0337456	NO
YDL130W	RPP1B	0.0331529	YES
YBR107C	IML3	0.0323316	NO
YDR507C	GIN4	0.031786	YES
YKL082C	RRP14	0.0316779	NO
YBL017C	PEP1	0.0314538	NO
YKL152C	GPM1	0.0311946	YES
YDR299W	BFR2	0.0311476	YES
YIL018W	RPL2B	0.0308887	YES
YHR195W	NVJ1	0.0302032	NO
YPL034W	YPL034W	0.0298315	YES
YJR123W	RPS5	0.0297762	YES
YOR020C	HSP10	0.0289881	NO
YLR029C	RPL15A	0.0288683	YES
YBR181C	RPS6B	0.0288321	YES
YNL209W	SSB2	0.0287799	YES
YBR189W	RPS9B	0.028388	YES
YDL081C	RPP1A	0.0281837	NO
YFR032C-A	RPL29	0.0271244	YES
YKL081W	TEF4	0.0260812	YES
YJL052W	TDH1	0.0260735	YES
YNL087W	TCB2	0.0247226	YES
YGR014W	MSB2	0.0246962	NO
YOR202W	HIS3	0.0245108	YES
YPL249C-A	RPL36B	0.0239863	YES
YHL034C	SBP1	0.023964	YES
YFR037C	RSC8	0.0237587	NO
YLR441C	RPS1A	0.0237026	NO
YOR270C	VPH1	0.0236338	YES
YKL054C	DEF1	0.0232157	YES
YDL022W	GPD1	0.0230437	YES
YLR264W	RPS28B	0.0223726	YES
YBR127C	VMA2	0.0220907	YES
YGR229C	SMI1	0.0217252	YES
YGR148C	RPL24B	0.0214697	YES
YDL133C-A	RPL41B	0.0213235	NO
YHL027W	RIM101	0.0212321	YES
YGR285C	ZUO1	0.0211637	YES
YMR251W-A	HOR7	0.0209645	YES
YMR295C	YMR295C	0.0209573	NO
YBR162C	TOS1	0.0208302	YES
YPL143W	RPL33A	0.0204805	YES
YDL095W	PMT1	0.0198281	YES
YJR138W	IML1	0.0196829	NO
YOR167C	RPS28A	0.0191133	NO
YEL017C-A	PMP2	0.0186747	NO
YGR192C	TDH3	0.0186217	YES
YER057C	HMF1	0.0184411	YES
YIL042C	PKP1	0.0180878	NO
YCR012W	PGK1	0.0175757	YES
YGL079W	KXD1	0.0169862	NO
YEL003W	GIM4	0.0168302	YES
YDR429C	TIF35	0.0165963	YES
YGL103W	RPL28	0.0161928	YES
YOR332W	VMA4	0.0155179	YES
YCR005C	CIT2	0.0150502	YES
YLR390W-A	CCW14	0.0148445	YES
YJL158C	CIS3	0.0147449	YES
YHR193C	EGD2	0.0144172	NO
YOR182C	RPS30B	0.0141484	YES
YLR117C	CLF1	0.0140116	NO
YJL012C	VTC4	0.0134128	YES
YEL002C	WBP1	0.0133354	NO
YHR174W	ENO2	0.0126969	YES
YBR011C	IPP1	0.0125419	YES
YJL127C-B	YJL127C-B	0.012351	NO
YER043C	SAH1	0.0120301	NO
YGR254W	ENO1	0.0117424	YES
YAL038W	CDC19	0.011713	YES
YLR044C	PDC1	0.0116489	YES
YNL178W	RPS3	0.0113525	NO
YJR104C	SOD1	0.0110389	YES
YKL056C	TMA19	0.0110171	YES
YDR050C	TPI1	0.0108869	YES
YPR036W-A	YPR036W-A	0.00968778	NO
YIL053W	RHR2	0.00914661	NO
YDL229W	SSB1	0.00913582	YES
YOR293W	RPS10A	0.00912927	NO
YHR203C	RPS4B	0.00891503	NO
YCL034W	LSB5	0.00880005	YES
YGR034W	RPL26B	0.00878423	YES
YGL092W	NUP145	0.00867256	NO
YOR063W	RPL3	0.00845521	YES
YJR009C	TDH2	0.0082647	NO
YPR043W	RPL43A	0.00823329	YES
YCR031C	RPS14A	0.00808525	YES
YLL045C	RPL8B	0.00793689	YES
YKL060C	FBA1	0.0078182	YES
YBR009C	HHF1	0.00773982	YES
YDR418W	RPL12B	0.00769701	YES
YGR282C	BGL2	0.00756019	YES
YDR161W	YDR161W	0.00721192	NO
YDL084W	SUB2	0.00704281	NO
YDL083C	RPS16B	0.00697317	YES
YLR027C	AAT2	0.00681507	YES
YER131W	RPS26B	0.00669672	YES
YLR061W	RPL22A	0.00653857	NO
YLR287C-A	RPS30A	0.00650728	NO
YJL136C	RPS21B	0.00647715	YES
YJL190C	RPS22A	0.00629167	YES
YIL133C	RPL16A	0.0062901	YES
YNL069C	RPL16B	0.00597231	YES
YLR340W	RPP0	0.00560105	YES
YOL086C	ADH1	0.00558939	YES
YHL033C	RPL8A	0.00530592	YES
YBR196C	PGI1	0.00512043	YES
YER025W	GCD11	0.00446732	NO
YGL008C	PMA1	0.00439925	YES
YNL031C	HHT2	0.0042411	YES
YLR249W	YEF3	0.00415786	YES
YDR127W	ARO1	0.00395462	YES
YNL145W	MFA2	0.00384623	NO
YOL120C	RPL18A	0.0034797	NO
YOL040C	RPS15	0.00343935	YES
YMR186W	HSC82	0.00339696	YES
YJL159W	HSP150	0.00312182	NO
YOR153W	PDR5	0.00178434	YES
